# Supplementary material for: Analysis of Different Complex Multilayer PACVD Coatings on Nanostructured WC-Co Cemented Carbide
Source: MDPI journal article supplement (doi:10.3390/coatings11070823), 2021-07-08
Supplement: s1 [file s1]

# Supplementary Materials: Analysis of Different Complex Multilayer PACVD Coatings on Nanostructured WC-Co Cemented Carbide

Danko Čorić <sup>1</sup>, Mateja Šnajdar Musa <sup>2,\*</sup>, Matija Sakoman <sup>1</sup>, and Željko Alar <sup>1</sup>

<sup>1</sup> Faculty of Mechanical Engineering and Naval Architecture, University of Zagreb, Ivana Lučića 5, 10000 Zagreb, Croatia; danko.coric@fsb.hr (D.Č.); matija.sakoman@fsb.hr (M.S.); zeljko.alar@fsb.hr (Ž.A.)

<sup>2</sup> Department of Polytechnics, University of Rijeka, Sveučilišna Avenija 4, 51000 Rijeka, Croatia

\* Correspondence: mateja.snajdar@uniri.hr

**Table S1.** Sample polishing parameters.

| Step | Diamond Paste, $\mu\text{m}$ | Speed of Rotation, rpm | Force, N | Time, min. |
|------|------------------------------|------------------------|----------|------------|
| 1    | 9                            | 150                    | 210      | 5          |
| 2    | 6                            | 150                    | 210      | 10         |
| 3    | 3                            | 150                    | 150      | 8          |

**Citation:** Čorić, D.; Musa, M.Š.; Sakoman, M.; Alar, Ž. Analysis of Different Complex Multilayer PACVD Coatings on Nanostructured WC-Co Cemented Carbide. *Coatings* **2021**, *11*, 823. <https://doi.org/10.3390/coatings11070823>

Academic Editors: Marek Szindler

Received: 28 May 2021

Accepted: 4 July 2021

Published: 8 July 2021

**Publisher's Note:** MDPI stays neutral with regard to jurisdictional claims in published maps and institutional affiliations.

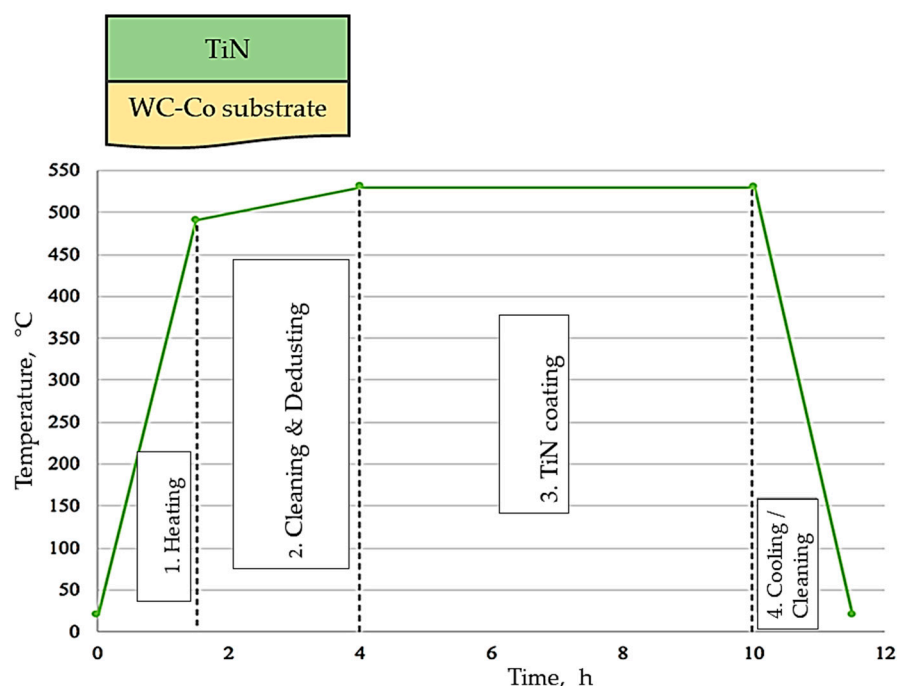

**Figure S1.** TiN coating process scheme.

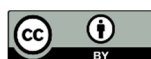

**Copyright:** © 2021 by the authors. Licensee MDPI, Basel, Switzerland. This article is an open access article distributed under the terms and conditions of the Creative Commons Attribution (CC BY) license (<http://creativecommons.org/licenses/by/4.0/>).

**Table S2.** TiN coating process parameters.

| Process Stage                | 1 Heating | 2 Cleaning | 3 TiN Coating | 4 Cooling/Cleaning |
|------------------------------|-----------|------------|---------------|--------------------|
| Duration, h                  | 1.5       | 2.5        | 6             | 1.5                |
| Pressure, mbar               | 2         | 2          | 2             | 2                  |
| Temperature, °C              | 20–490    | 490–530    | 530           | 530–20             |
| Flow H <sub>2</sub> , L/h    | 140       | 140        | 140           | 100                |
| Flow Ar, L/h                 | 0         | 10         | 10            | 0                  |
| Flow TiCl <sub>4</sub> , L/h | 0         | 0          | 3,6           | 0                  |
| Flow N <sub>2</sub> , L/h    | 0         | 23         | 15            | 0                  |
| N <sub>2</sub> pulse         | -         | -          | 12s/12s       | -                  |
| Voltage, V                   | 0         | 540        | 490           | 0                  |
| Plasma power, W              | 0         | 900–1800   | 2200          | 0                  |

**Table S3.** TiCN coating process parameters.

| Process stage                | 1 Heating | 2 Cleaning | 3 TiN | 4 TiN   | 4 TiN–TiCN Alterations | 5 TiCN  | 5 TiN  | 6 TiCN  | 7 Cooling/Cleaning |
|------------------------------|-----------|------------|-------|---------|------------------------|---------|--------|---------|--------------------|
| Duration                     | 1.5 h     | 2.5 h      | 1 h   | 750 s   | 500 s<br>20 x          | 500 s   | 1000 s | 1000 s  | 1.5 h              |
| Pressure, mbar               | 2         | 2          | 2     | 2       | 2                      | 2       | 2      | 2       | 2                  |
| Temperature, °C              | 20–490    | 490–530    | 530   | 530     | 530                    | 530     | 530    | 530     | 530–20             |
| Flow H <sub>2</sub> , L/h    | 140       | 140        | 140   | 140     | 140                    | 140     | 140    | 140     | 100                |
| Flow Ar, L/h                 | 0         | 10         | 10    | 10      | 10                     | 10      | 10     | 10      | 0                  |
| Flow CH <sub>4</sub> , L/h   | 0         | 0          | 0     | 0       | 4,5                    | 4,5     | 0      | 4,5     | 0                  |
| Flow TiCl <sub>4</sub> , L/h | 0         | 0          | 3     | 3       | 3                      | 3       | 3      | 3       | 0                  |
| Flow N <sub>2</sub> , L/h    | 0         | 23         | 15    | 15      | 13                     | 15      | 15     | 15      | 0                  |
| N <sub>2</sub> pulse         | -         | -          | -     | 12s/12s | 12s/12s                | 12s/12s | -      | 12s/12s | -                  |
| Voltage, V                   | 0         | 520–540    | 490   | 490     | 490                    | 490     | 490    | 490     | 0                  |
| Plasma power, W              | 0         | 900–1800   | 1650  | 1950    | 1950                   | 1950    | 1650   | 1950    | 0                  |

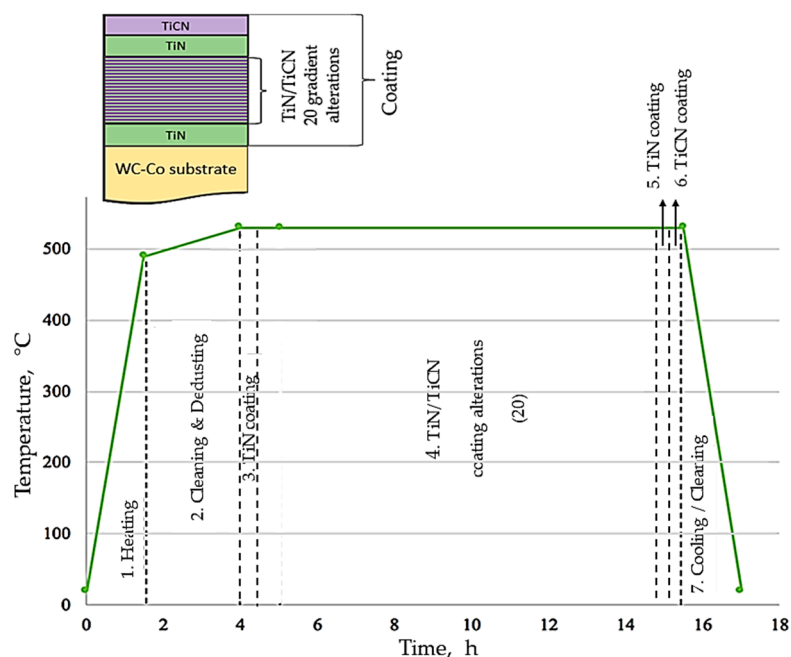**Figure S2.** TiCN coating process scheme.

**Table S4.** TiBN coating process parameters [1].

| Process stage                | 1 Heating | 2 Cleaning | 3 TiN | 4<br>TiN/TiB <sub>2</sub><br>transition | 5 TiN | 6 TiB <sub>2</sub> | 7 Cooling/Cleaning |
|------------------------------|-----------|------------|-------|-----------------------------------------|-------|--------------------|--------------------|
| Duration                     | 1.5 h     | 2.5 h      | 1 h   | 500 s                                   | 250 s | 1200 s             | 1200 s             |
| Prepressure, mbar            | 2         | 2          | 2     | 2                                       | 2     | 2                  | 2                  |
| Temperature, °C              | 20–490    | 490–530    | 530   | 530                                     | 530   | 530                | 530–20             |
| Flow H <sub>2</sub> , L/h    | 140       | 140        | 140   | 140                                     | 140   | 140                | 100                |
| Flow Ar, L/h                 | 0         | 10         | 10    | 7                                       | 10    | 7                  | 0                  |
| Flow CH <sub>4</sub> , L/h   | 0         | 0          | 0     | 4,5                                     | 0     | 0                  | 0                  |
| Flow TiCl <sub>4</sub> , L/h | 0         | 0          | 3     | 3                                       | 3     | 3                  | 0                  |
| Flow N <sub>2</sub> , L/h    | 0         | 23         | 15    | 15                                      | 15→0  | 0                  | 0                  |
| Flow BCl <sub>3</sub> , L/h  | 0         | 0          | 0     | 0                                       | 0→9   | 9                  | 0                  |
| Voltage, V                   | 0         | 520–540    | 490   | 490                                     | 560   | 560                | 0                  |
| Plasma power, W              | 0         | 900–1800   | 1650  | 1650                                    | 1650  | 1650               | 0                  |

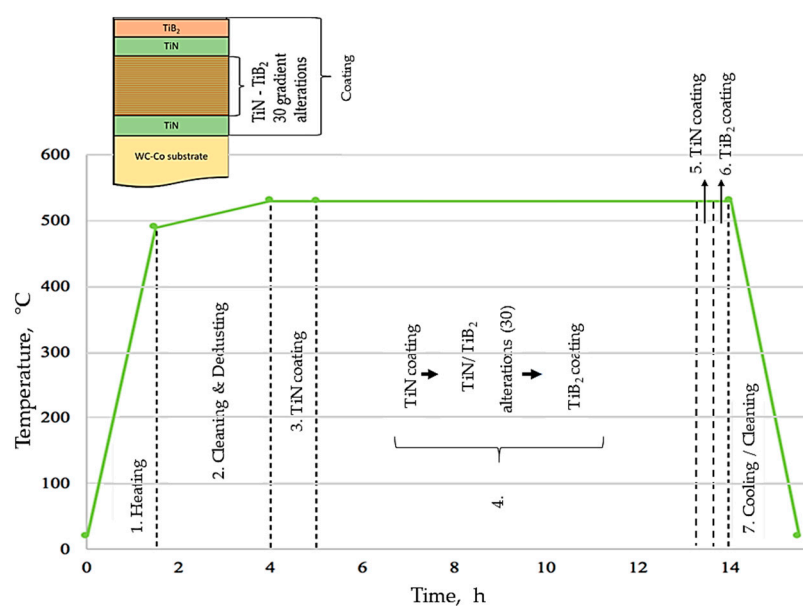**Figure S3.** TiBN coating process scheme.

## References

1. Šnajdar Musa, M.; Sakoman, M.; Ćorić, D.; Fabijanić, T.A. Exploitation and wear properties of nanostructured WC-Co tool modified with plasma-assisted chemical vapor deposition TiBN coating. *Metals* **2021**, *11*, 333, doi:10.3390/met11020333.
